# Supplementary material for: The Potential of Pectins to Modulate the Human Gut Microbiota Evaluated by In Vitro Fermentation: A Systematic Review
Source: MDPI journal article supplement (doi:10.3390/nu14173629), 2022-09-02
Supplement: s1 [file s1]

Supplementary Materials

# The Potential of Pectins to Modulate the Human Gut Microbiota Evaluated by In Vitro Fermentation: A Systematic Review

**Supplementary Table S1.** The search strategy used for identification of the relevant studies included in the systematic review can be seen below.

| Database | Search strategy                                                                                                                                                                                                                                                                                                                                                                                                                                                                                                                                                                                                                                                                                                                                                                                                                                                                                                                                                                                                                                                                                                                                                                                                                                                                                                                                                                                                                                                                                                                                                                                                                                                                                                                                                                                                                                                                                                                                                      |
|----------|----------------------------------------------------------------------------------------------------------------------------------------------------------------------------------------------------------------------------------------------------------------------------------------------------------------------------------------------------------------------------------------------------------------------------------------------------------------------------------------------------------------------------------------------------------------------------------------------------------------------------------------------------------------------------------------------------------------------------------------------------------------------------------------------------------------------------------------------------------------------------------------------------------------------------------------------------------------------------------------------------------------------------------------------------------------------------------------------------------------------------------------------------------------------------------------------------------------------------------------------------------------------------------------------------------------------------------------------------------------------------------------------------------------------------------------------------------------------------------------------------------------------------------------------------------------------------------------------------------------------------------------------------------------------------------------------------------------------------------------------------------------------------------------------------------------------------------------------------------------------------------------------------------------------------------------------------------------------|
| PubMed   | <p>((pecti*[Title/Abstract]) OR (galacturo*[Title/Abstract]) OR (rhamnogalacturo*[Title/Abstract]) OR (polygalacturo*[Title/Abstract]) OR (homogalacturo*[Title/Abstract]) OR (pectate[Title/Abstract]) OR (arabino-oligosaccharide*[Title/Abstract]) OR (arabinan[Title/Abstract]) OR (pAOS[Title/Abstract]) OR ("cane fiber"[Title/Abstract]) OR ("beet fiber"[Title/Abstract]) OR ("citrus peel fiber"[Title/Abstract]) OR ("citrus fiber"[Title/Abstract]) OR ("apple fiber"[Title/Abstract])) AND ((prebiotic*[Title/Abstract]) OR (microbi*[Title/Abstract]) OR (flora[Title/Abstract]) OR (short chain fatty acid*[Title/Abstract]) OR (short-chain fatty acid*[Title/Abstract]) OR (scfa[Title/Abstract]) OR (butyrate[Title/Abstract]) OR (acetate[Title/Abstract]) OR (propionate[Title/Abstract]) OR (lactate[Title/Abstract]) OR (ferment*[Title/Abstract]) OR (intestin*[Title/Abstract]) OR (gastro*[Title/Abstract]) OR (fecal[Title/Abstract]) OR (faecal[Title/Abstract]) OR (feces[Title/Abstract]) OR (faeces[Title/Abstract]) OR (stool*[Title/Abstract]) OR (butyrogenic[Title/Abstract]) OR (bifidogenic[Title/Abstract])) AND ((vitro[Title/Abstract]) OR (donor*[Title/Abstract]) OR (human*[Title/Abstract]) OR (patient*[Title/Abstract]) OR (adult*[Title/Abstract]) OR (child*[Title/Abstract]) OR (infant*[Title/Abstract]) OR (elderly[Title/Abstract]) OR (senescence[Title/Abstract]) OR (bifido*[Title/Abstract]) OR (lactobacill*[Title/Abstract]) OR (bacterioide*[Title/Abstract]) OR (enterococc*[Title/Abstract]) OR (faecalibacterium[Title/Abstract]) OR (roseburia[Title/Abstract]) OR (clostridi*[Title/Abstract]) OR (ruminococc*[Title/Abstract]) OR (coprococc*[Title/Abstract]) OR (eubacterium[Title/Abstract]) OR (lachnospira*[Title/Abstract]) OR (Akkermansia[Title/Abstract]) OR (probiotic*[Title/Abstract]) OR (firmicutes[Title/Abstract]) OR (subject*[Title/Abstract]) OR (volunteer*[Title/Abstract]))</p> |
| Scopus   | <p>TITLE-ABS (pecti* OR galacturo* OR rhamnogalacturo* OR polygalacturo* OR homogalacturo* OR pectate OR arabino-oligosaccharide OR arabinan OR (pAOS) OR "cane fiber" OR "beet fiber" OR (citrus PRE/1 fiber) OR "apple fiber") AND TITLE-ABS (prebiotic* OR microbi* OR flora OR "short chain fatty acid" OR scfa OR butyrate OR acetate OR propionate OR lactate OR ferment* OR intestin* OR gastro* OR fecal OR faecal OR feces OR faeces OR stool OR butyrogenic OR bifidogenic) AND TITLE-ABS (vitro OR donor OR human* OR patient OR adult* OR child* OR infant* OR elderly OR senescence OR bifido* OR lactobacill* OR bacterioide* OR enterococc* OR faecalibacterium OR roseburia OR clostridi* OR ruminococc* OR coprococc* OR eubacterium OR lachnospira* OR Akkermansia OR probiotic* OR firmicutes OR subject OR volunteer)</p>                                                                                                                                                                                                                                                                                                                                                                                                                                                                                                                                                                                                                                                                                                                                                                                                                                                                                                                                                                                                                                                                                                                        |
